# Supplementary material
Source: PubMed Central journal article supplement (PMC3473195)

## Figure Legend

Photomicrographs of representative Purkinje neurons



Vehicle

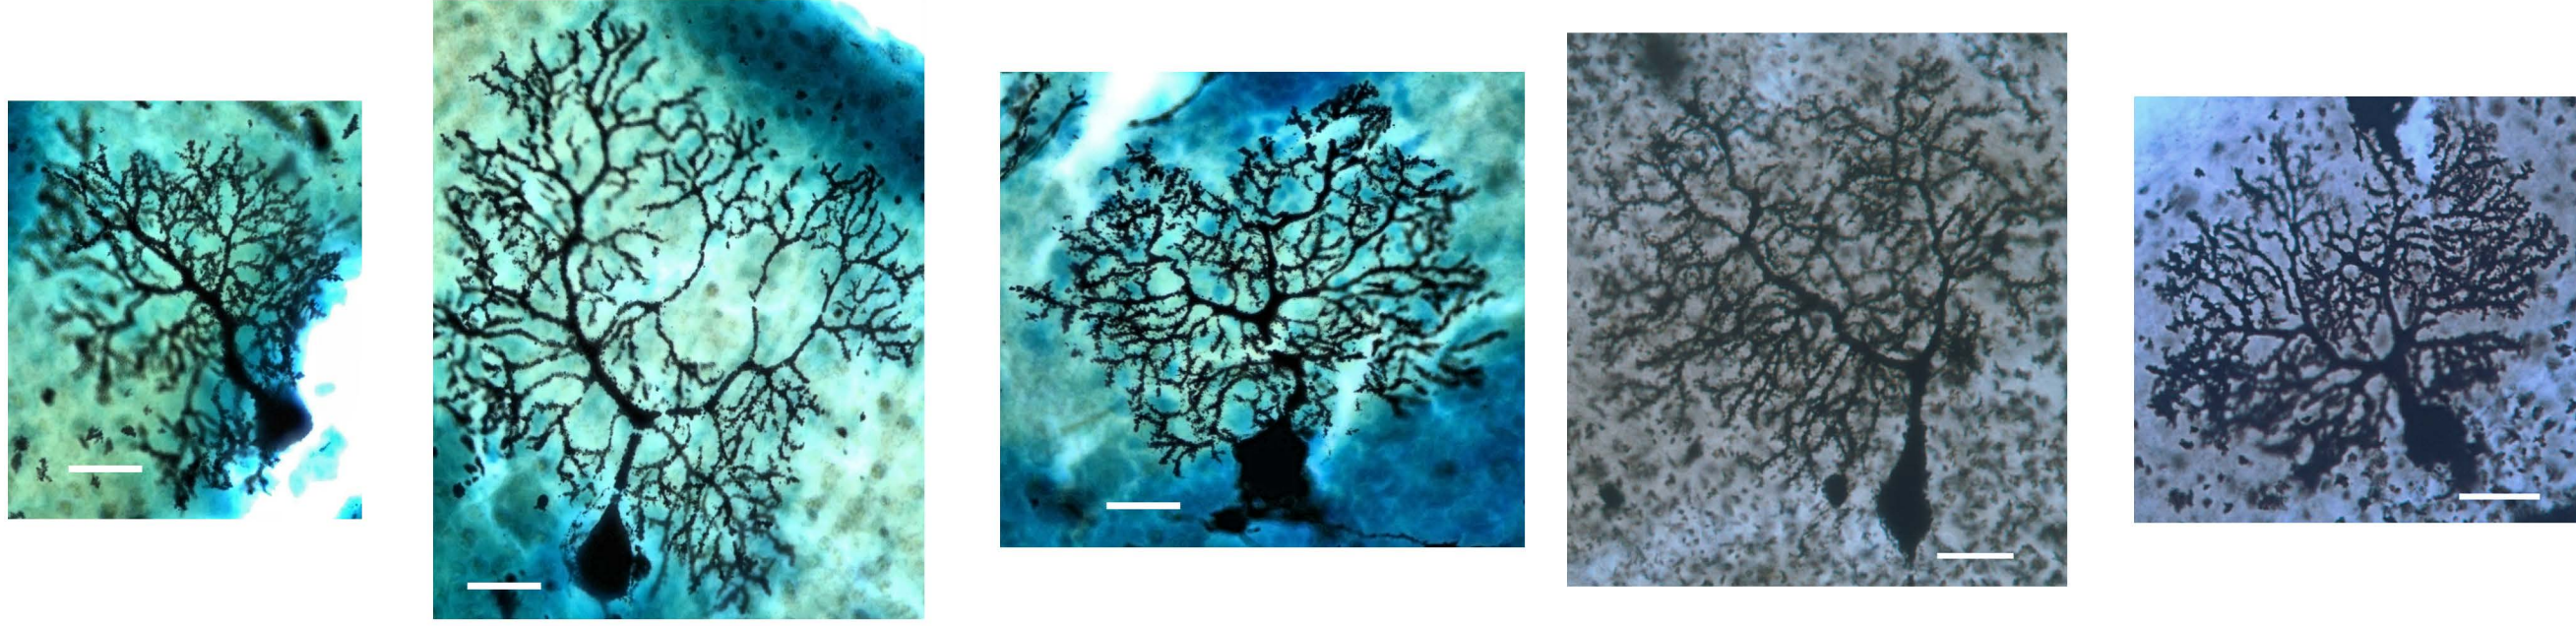

Formestane

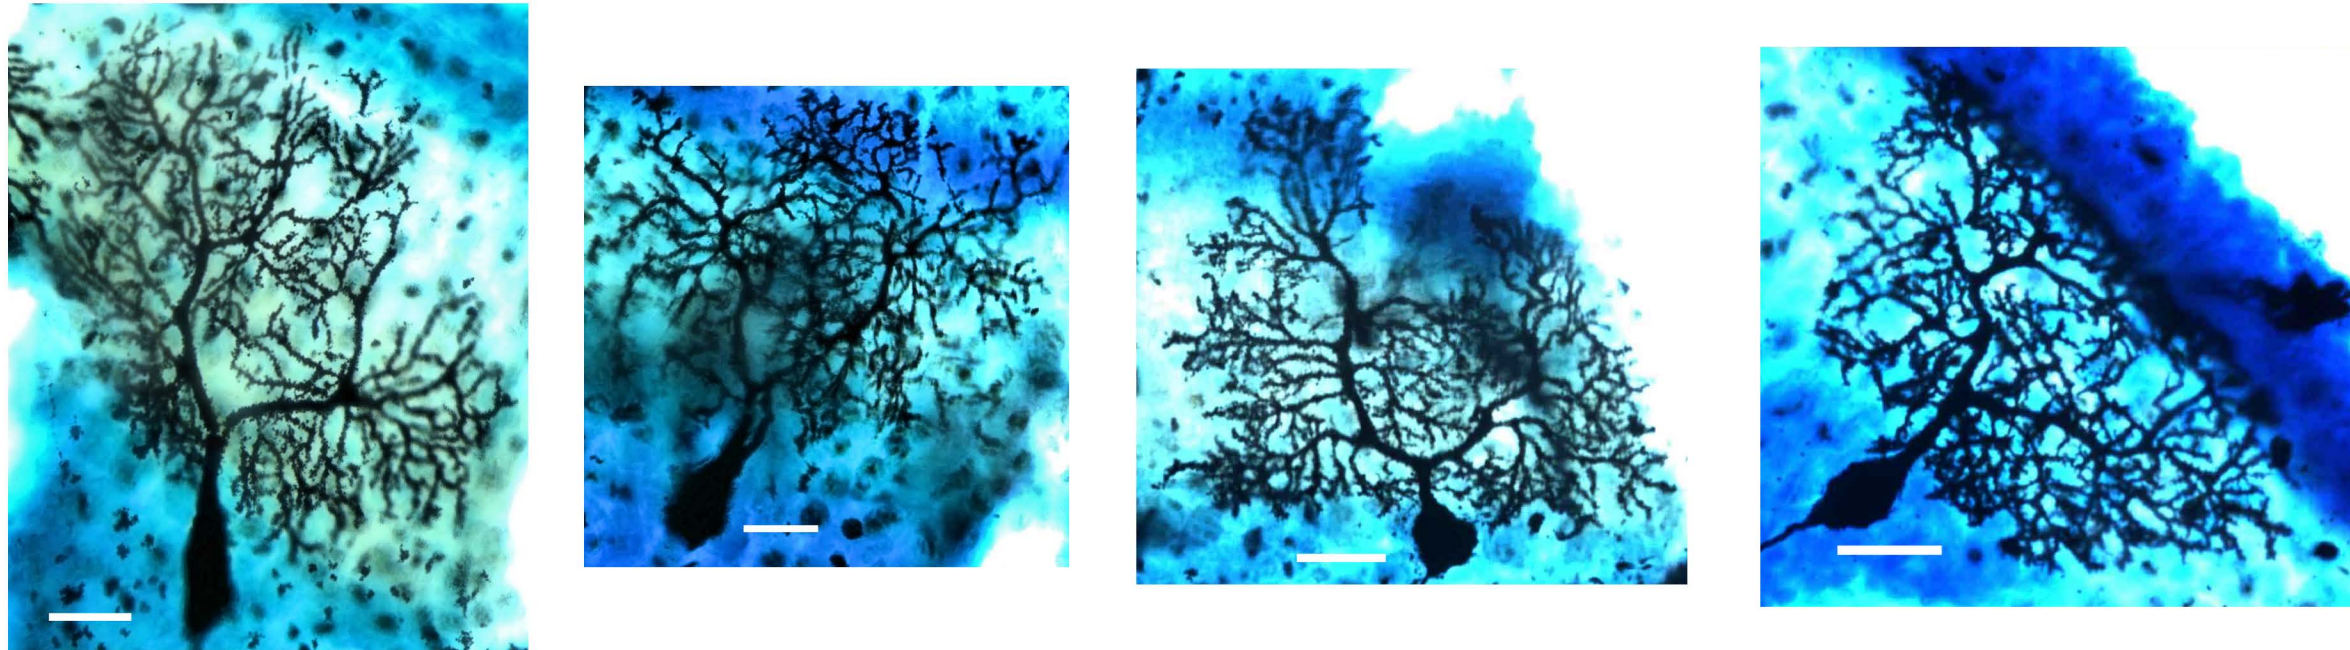

Nimesulide

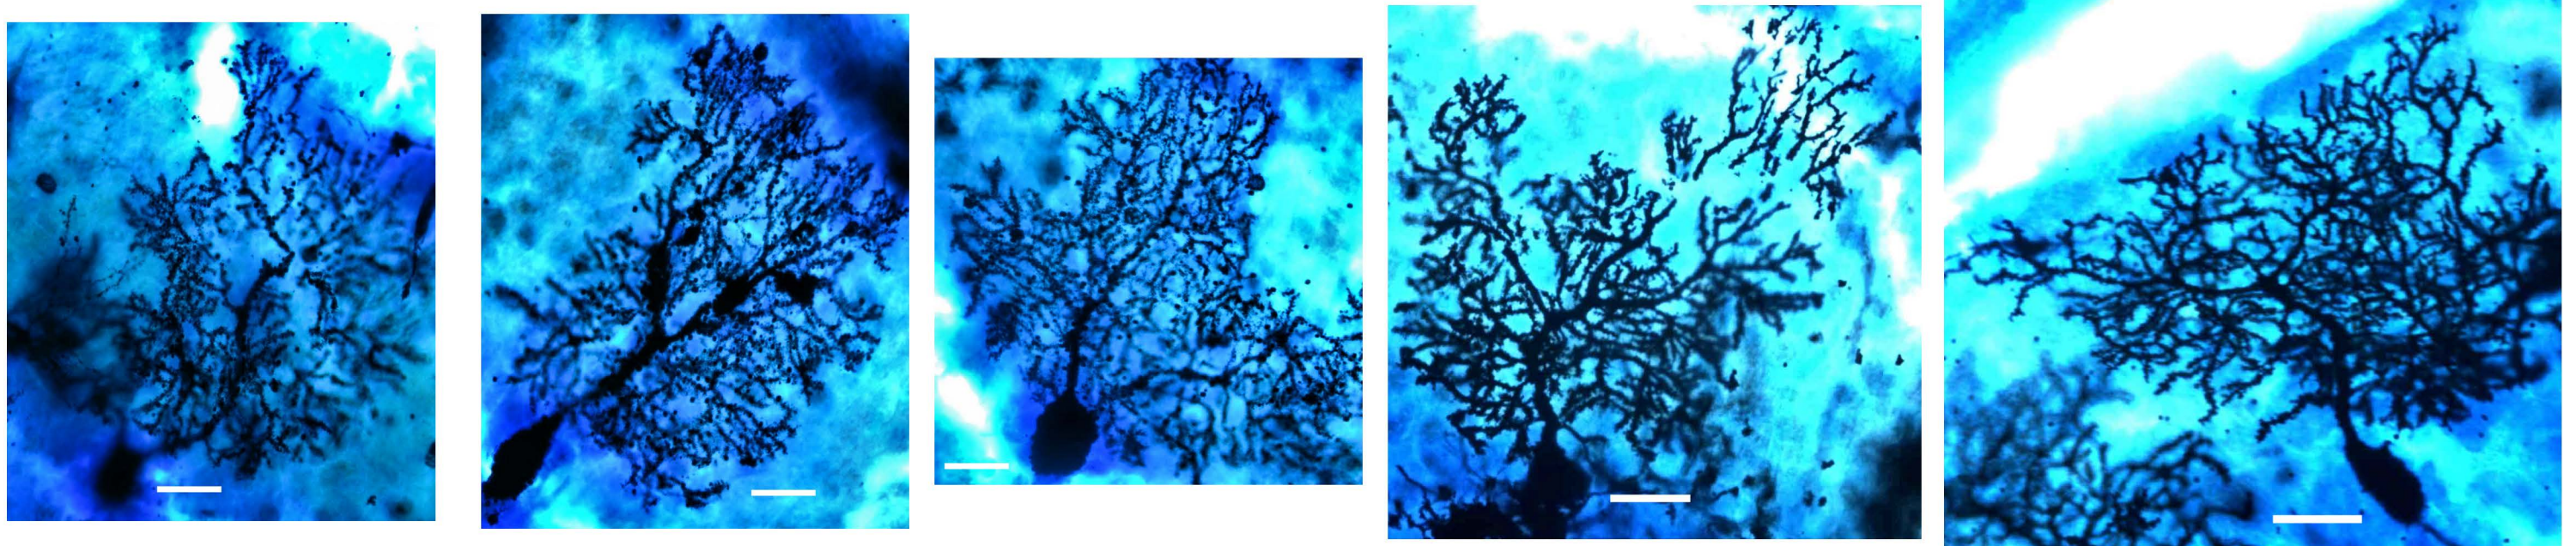

Estradiol

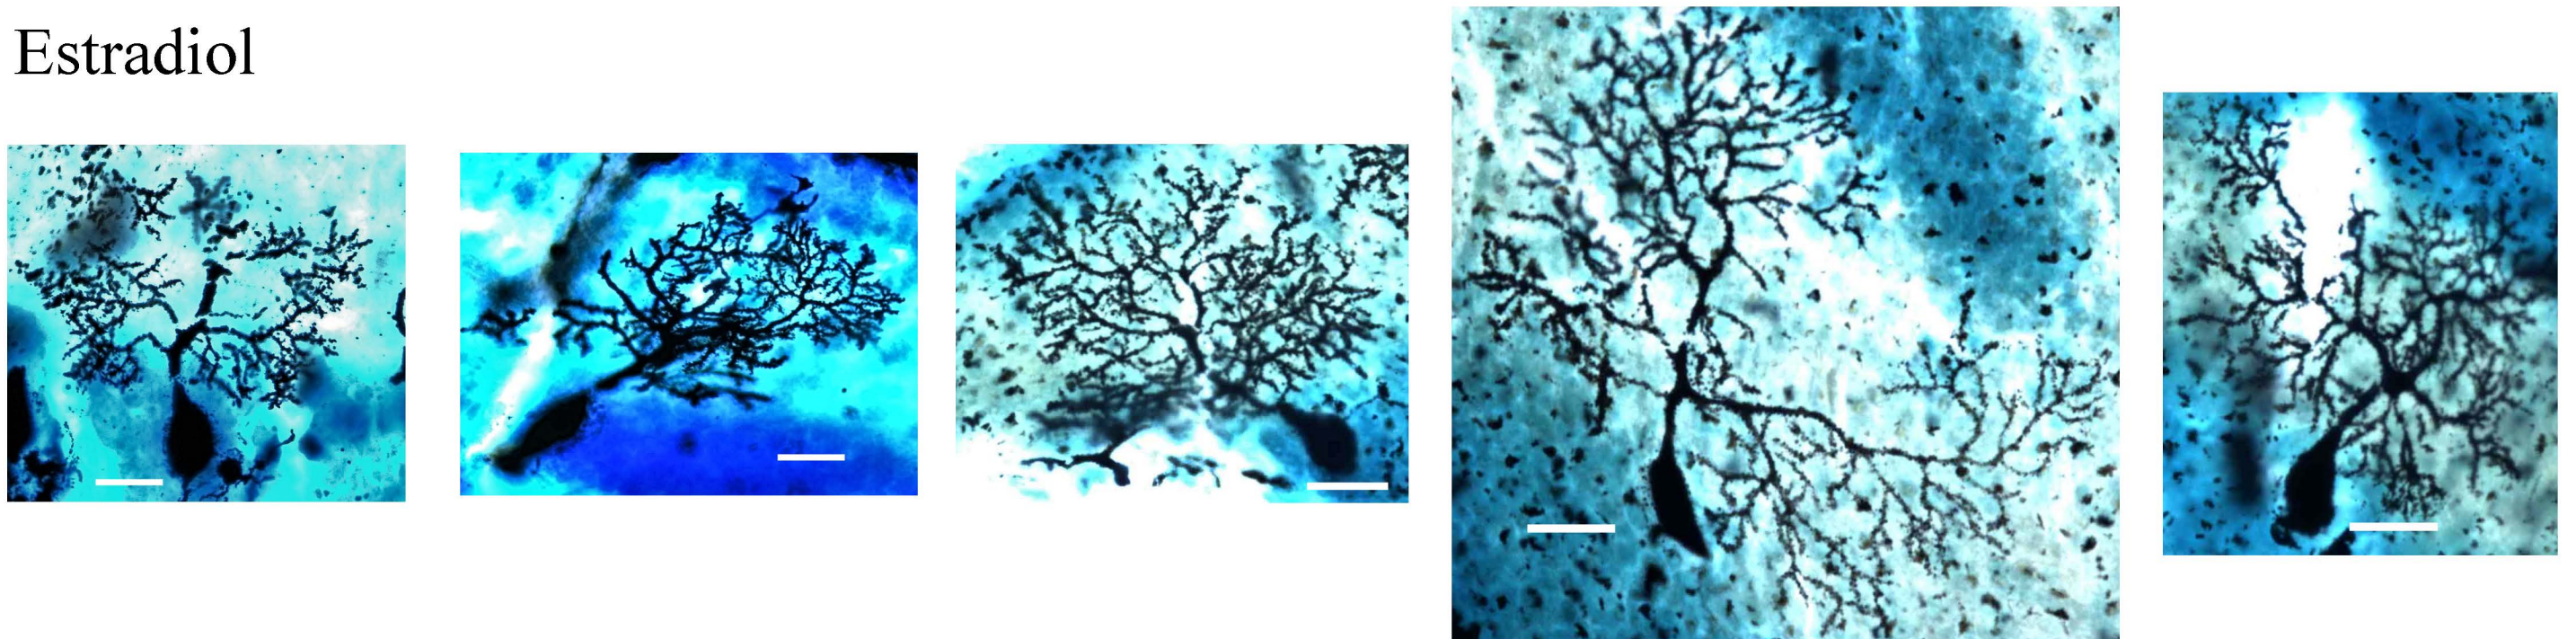

Estradiol + Nimesulide

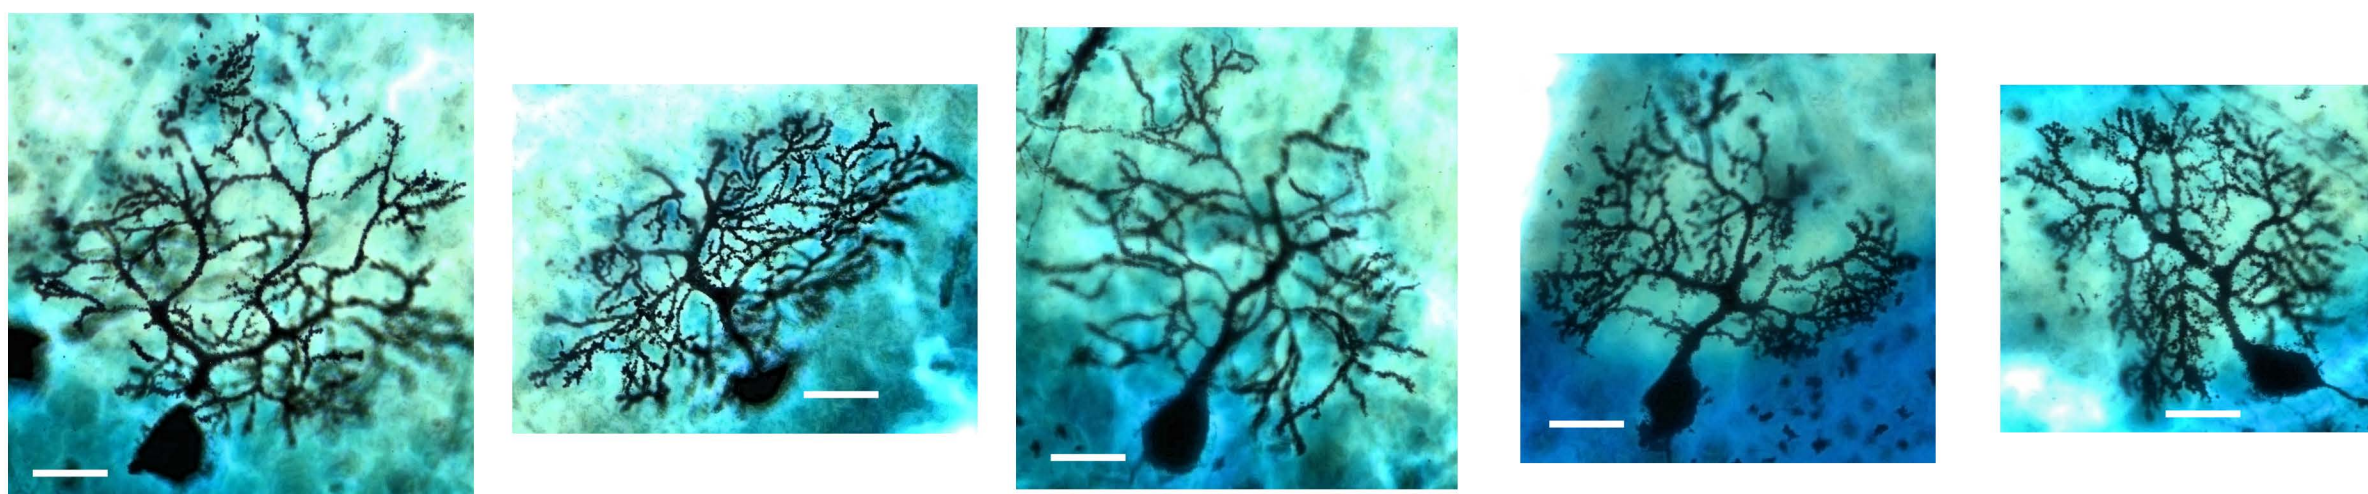

PGE2

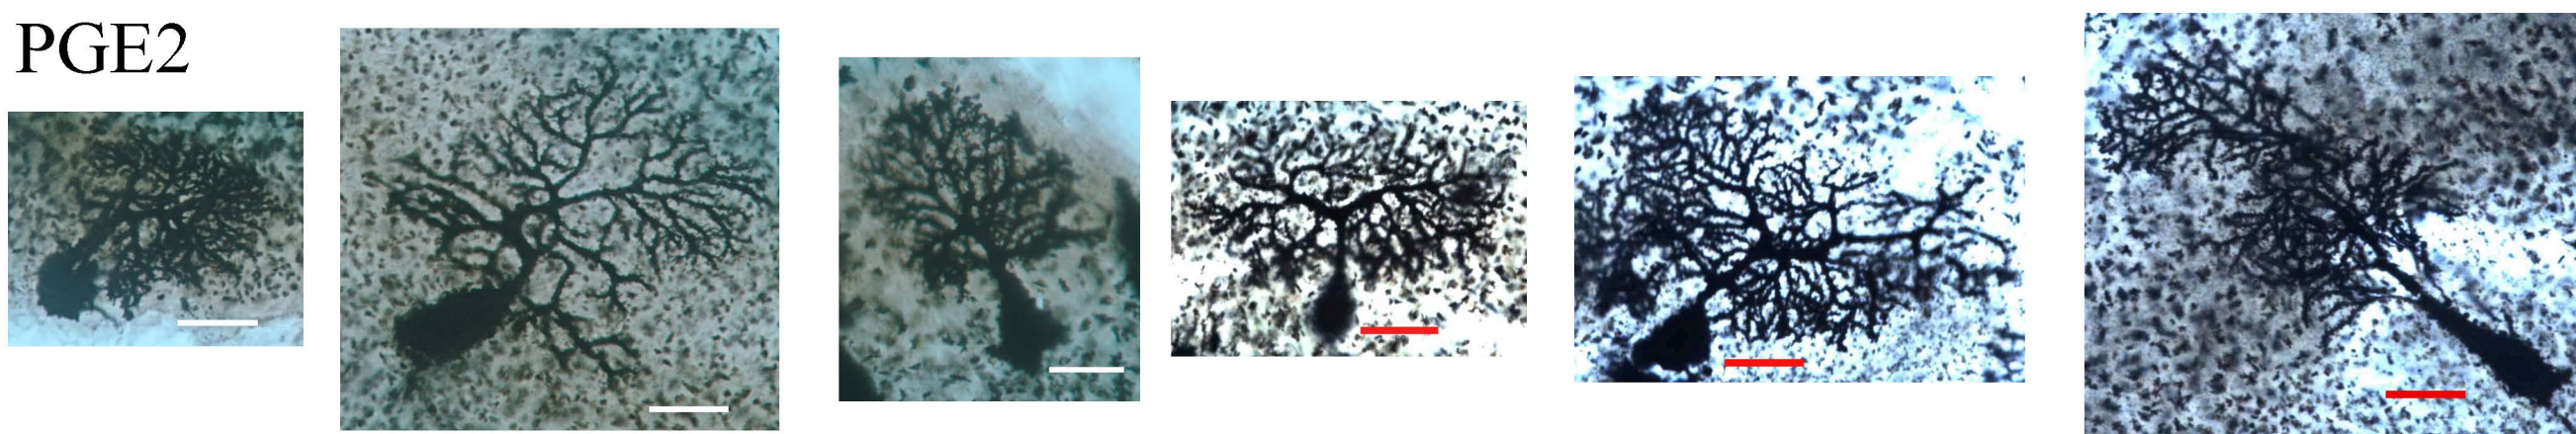

Supplement: supp_en.2012-1350v1_En-12-1350figure1.pdf [file supp_en.2012-1350v1_En-12-1350figure1.pdf]
